# Supplementary material for: Constitutive Activation of NF-κB Pathway in Hematopoietic Stem Cells Causes Loss of Quiescence and Deregulated Transcription Factor Networks
Source: Front Cell Dev Biol. 2018 Oct 30;6:143. doi: 10.3389/fcell.2018.00143 (PMC6218573; doi:10.3389/fcell.2018.00143)
Supplement: TABLE S2 — Gene ontology (GO) analysis on upregulated genes in IKK2CA/+ HSCs. [file Table_2.XLSX]

## Sheet: Sheet1
Supplemental Online Table2. Gene Ontology (GO) analysis on upregulated genes in IKK2CA/+ HSCs.
Term	PValue	Genes
GO:0030528~transcription regulator activity	0.000605721	E2F4, Nfkbie, Ahctf1, Cited4, Gata1, Mll5, Meis2, Hey1, Gatad2B, Bcl3, Skil, Gatad1, Sertad1, Egr1, Ciita, Klf6, Batf2, Klf13, Relb, Klf16, Med11, Stat1, Junb, Ddit3, Hes1, Taf11, Taf10, Atf4, Pa2G4, Atf3, Mrpl28, Mtf1, Phb2, Med9, Gtf2F2, Irf1, Id3, Klf2, Klf1, Hdac7
GO:0019001~guanyl nucleotide binding	0.00150371	Gpn2, Gna14, Gbp6, Rab4A, Rrad, Ifi47, Pde10A, Hras1, Rasl11B, Igtp, Gvin1, Gp1Bb, Rras, Gbp3, Ehd3, Gbp2, Sept8
GO:0032561~guanyl ribonucleotide binding	0.00150371	Gpn2, Gna14, Gbp6, Rab4A, Rrad, Ifi47, Pde10A, Hras1, Rasl11B, Igtp, Gvin1, Gp1Bb, Rras, Gbp3, Ehd3, Gbp2, Sept8
GO:0042605~peptide antigen binding	0.00207769	H2-K1, Loc641240, H2-Aa, H2-Ab1, H2-Q6, H2-Q7, H2-Q8
GO:0005525~GTP binding	0.0030256	Gpn2, Gna14, Gbp6, Rab4A, Rrad, Ifi47, Hras1, Rasl11B, Igtp, Gvin1, Gp1Bb, Rras, Gbp3, Ehd3, Gbp2, Sept8
GO:0003823~antigen binding	0.00400759	H2-K1, Ighg, Loc641240, H2-Aa, H2-Ab1, Igl-V1, H2-Q6, H2-Q7, H2-Q8, Igh-Vj558
GO:0003677~DNA binding	0.00644226	Hist2H2Aa2, Gtf3A, E2F4, Hist2H2Aa1, Gata1, Zfp91, Hist2H2Ab, Hist1H2Bm, Gfi1B, Hist1H2Bn, Hey1, Hist1H2Bk, Hist1H2Bj, Rabgef1, Gatad1, Egr1, Egr3, Batf2, Relb, Junb, Ddit3, Hes1, Taf11, Taf10, Pa2G4, Mtf1, Hist2H2Be, Edf1, Tnfaip3, Hist1H2Ab, Hist1H4K, Ahctf1, Hist2H3C1, Meis2, Hist1H4A, Gatad2B, Bcl3, Hist1H4C, Hist1H4J, Hist1H4H, Klf6, Hist1H2Be, Klf13, Hist1H2Bf, Sphk1, Hist1H2Bh, Klf16, Stat…
GO:0003924~GTPase activity	0.0107942	Gna14, Gbp6, Igtp, Gnb4, Gbp3, Gbp2, Ehd3, Hras1
GO:0004364~glutathione transferase activity	0.0125628	Mgst3, Gstt1, Bc021614, Gstm5
GO:0003702~RNA polymerase II transcription factor activity	0.0127682	Taf11, Taf10, Atf4, Klf13, Med9, Gtf2F2, Med11
GO:0032555~purine ribonucleotide binding	0.0276325	Gpn2, Gna14, Aldh18A1, Ass1, Adcy6, Rrad, Asns, Vars, Abca3, Trib2, Mthfd1, Acss1, Igtp, Gp1Bb, Nubp2, Tap1, Rras, Dyrk3, Loc100046898, Ehd3, Ciita, Gbp6, Hsp90Aa1, Map2K3, Rab4A, Sphk1, Ube2L6, Ifi47, Pde10A, Dapk2, Atp13A3, Abcb6, Abcg4, Hras1, Abcb4, Psmb9, Rasl11B, Khk, Papola, Plk3, Gvin1, Gtf2F2, H2-Aa, Gbp3, Sept8, Gbp2
GO:0032553~ribonucleotide binding	0.0276325	Gpn2, Gna14, Aldh18A1, Ass1, Adcy6, Rrad, Asns, Vars, Abca3, Trib2, Mthfd1, Acss1, Igtp, Gp1Bb, Nubp2, Tap1, Rras, Dyrk3, Loc100046898, Ehd3, Ciita, Gbp6, Hsp90Aa1, Map2K3, Rab4A, Sphk1, Ube2L6, Ifi47, Pde10A, Dapk2, Atp13A3, Abcb6, Abcg4, Hras1, Abcb4, Psmb9, Rasl11B, Khk, Papola, Plk3, Gvin1, Gtf2F2, H2-Aa, Gbp3, Sept8, Gbp2
GO:0030247~polysaccharide binding	0.0345017	Abp1, Susd2, Vegfa, Tgfbr3, Ltf, Col5A1, Rpl29
GO:0001871~pattern binding	0.0345017	Abp1, Susd2, Vegfa, Tgfbr3, Ltf, Col5A1, Rpl29
GO:0008009~chemokine activity	0.0345727	Cxcl9, Ccl19, Ccl5, Cxcl10
GO:0017076~purine nucleotide binding	0.0346868	Gpn2, Gna14, Aldh18A1, Ass1, Adcy6, Rrad, Asns, Vars, Abca3, Trib2, Mthfd1, Acss1, Loc100044101, Igtp, Gp1Bb, Nubp2, Tap1, Rras, Dyrk3, Loc100046898, Ehd3, Ciita, Gbp6, Hsp90Aa1, Map2K3, Rab4A, Sphk1, Ube2L6, Ifi47, Pde10A, Dapk2, Atp13A3, Abcb6, Abcg4, Hras1, Abcb4, Psmb9, Rasl11B, Khk, Papola, Plk3, Gvin1, Gtf2F2, H2-Aa, Txnrd2, Gbp3, Sept8, Gbp2
GO:0042379~chemokine receptor binding	0.0369467	Cxcl9, Ccl19, Ccl5, Cxcl10
GO:0003700~transcription factor activity	0.0372687	Egr1, Klf6, E2F4, Batf2, Relb, Klf16, Ahctf1, Stat1, Junb, Ddit3, Gata1, Atf4, Pa2G4, Meis2, Atf3, Hey1, Mtf1, Mrpl28, Irf1, Bcl3, Gatad2B, Gatad1, Klf2
